# Supplementary material for: Genome-scale reconstruction of the metabolic network in Pseudomonas stutzeri A1501
Source: Royal Society of Chemistry journal article supplement (doi:10.1039/c5mb00086f), 2015-08-12
Supplement: c5mb00086f3.pdf [file c5mb00086f3.pdf]

## Genome-scale reconstruction of the metabolic network in *Pseudomonas stutzeri* A1501

Parizad Babaei, Sayed-Amir Marashi, Sedigheh Asad

### Supplementary file S3: Details of the *in silico* simulations

#### M9 medium simulation

In order to simulate chemically defined M9 medium, the constraints in Table S1 were set on exchange reaction.

**Table S1.** The metabolites represented in the table are the components of M9 minimal medium. These metabolites were allowed to enter the system and simulate aerobic growth on M9 medium using glucose as the only carbon source.

| Metabolite                            | Lower bound | Upper bound |
|---------------------------------------|-------------|-------------|
| Cl <sup>-</sup> [e] <=>               | -1000       | 1000        |
| CO <sub>2</sub> [e] <=>               | -1000       | 1000        |
| Co <sup>2+</sup> [e] <=>              | -1000       | 1000        |
| Cu <sup>2+</sup> [e] <=>              | -1000       | 1000        |
| Fe <sup>3+</sup> [e] <=>              | -1000       | 1000        |
| D-Glucose[e] <=>                      | -10         | 0           |
| H <sup>+</sup> [e] <=>                | -1000       | 1000        |
| H <sub>2</sub> O[e] <=>               | -1000       | 1000        |
| K <sup>+</sup> [e] <=>                | -1000       | 1000        |
| Mg <sup>2+</sup> [e] <=>              | -1000       | 1000        |
| Mn <sup>2+</sup> [e] <=>              | -1000       | 1000        |
| Na <sup>+</sup> [e] <=>               | -1000       | 1000        |
| NH <sub>4</sub> <sup>+</sup> [e] <=>  | -1000       | 1000        |
| O <sub>2</sub> [e] <=>                | -1000       | 1000        |
| Pi[e] <=>                             | -1000       | 1000        |
| SO <sub>4</sub> <sup>2-</sup> [e] <=> | -1000       | 1000        |
| Mo <sup>2+</sup> [e] <=>              | -1000       | 1000        |
| Zn <sup>2+</sup> [e] <=>              | -1000       | 1000        |

#### Anaerobic growth simulation

Anaerobic conditions in M9 minimal medium were simulated by blocking oxygen from entering the systems and instead letting nitrate enter the system and serve as the final electron acceptor. Additional conditions are described in Table S2.

**Table S2.** The constraints on the lower and the upper bounds of the reactions in the table were used to simulate anaerobic growth.

| Reaction ID | Reaction name                              | Lower bound | Upper bound |
|-------------|--------------------------------------------|-------------|-------------|
| IR10379     | (S)-Dihydroorotate:fumarate oxidoreductase | -1000       | 1000        |
| EX_EC0007   | Oxygen exchange                            | 0           | 1000        |
| EX_EC0201   | Nitrate exchange                           | -1000       | 1000        |
| IR10372     | Aerobic biomass                            | 0           | 0           |
| IR10380     | Anaerobic biomass                          | 0           | 1000        |

### ***narG* mutant construction and analysis**

In order to simulate the knock-out strain we eliminated the reaction associated to *narG* gene by setting the lower and the upper bound of the aforementioned reaction to zero. Then, we ran FBA to see the effect of *narG* gene deletion on computational growth rate. Table S3 represents quantitative computational results.

**Table S3.** Experimental observations and computational results ( $\text{h}^{-1}$ ) concerning anaerobic growth of the wild type and *narG* mutant strain of *Pseudomonas stutzeri* A1501 in the presence of nitrate and nitrite. The qualitative consistency is observable in all four cases.

|                           | Nitrate-containing medium |               | Nitrite-containing medium |               |
|---------------------------|---------------------------|---------------|---------------------------|---------------|
|                           | Experimental              | Computational | Experimental              | Computational |
| Wild type strain          | 0.453                     | 0.399         | 0.416                     | 0.399         |
| <i>NarG</i> mutant strain | 0                         | 0             | 0.355                     | 0.399         |

The values represented in the experimental column are estimated according to the results of [Ref. <sup>1</sup>].

### **Denitrification activity**

The denitrification pathway flux is represented in Table S4.

**Table S4.** FBA results reflecting the activity of the denitrification pathway in  $\text{mmol/g}_{\text{dwh}}$ .

|                           | Nitrate-containing medium | Nitrite-containing medium |
|---------------------------|---------------------------|---------------------------|
| Wild type strain          | 33.0                      | 55.0                      |
| <i>NarG</i> mutant strain | 0                         | 55.0                      |

### **Nitrate reductase activity**

Whole-cell nitrate reductase activity (NRA) of *P. stutzeri* was measured under different oxygen-limiting conditions <sup>1</sup>. The mutant strain showed no NRA under neither anaerobic nor micro-aerobic conditions. Only a slight NRA ( $\sim 61.2 \text{ nmol}_{\text{nitrite}}/\text{min mg}_{\text{protein}}$ ) has been observed for the mutant strain. The wild type strain showed nitrate reductase activity under all three oxygen-limiting conditions.

**Table S5.** Nitrate reductase activity in wild type and *narG* mutant strain of *P. stutzeri*. The experimental results are represented in nmol<sub>nitrite</sub>/min mg<sub>protein</sub> (estimated from Figure 3 of Ref. <sup>1</sup>) . The computational results are shown in values representing the flux of nitrate uptake reaction (mmol/g<sub>DWh</sub>). In cases where the minimum and the maximum nitrate uptake flux rates were not identical, both values are shown in the table.

|                           | Anaerobic     |                | Micro-aerobic |                | Aerobic       |                    |
|---------------------------|---------------|----------------|---------------|----------------|---------------|--------------------|
|                           | Experiment al | Computation al | Experiment al | Computation al | Experiment al | Computation al     |
| Wild type strain          | 439 ± 142     | 33.0           | 663 ± 51.0    | 32.3           | 193 ± 173     | 6×10 <sup>-5</sup> |
| <i>narG</i> mutant strain | 0             | 0              | 0             | 0.75–1         | 51 ± 10.2     | 4×10 <sup>-5</sup> |

## References:

1. H. Rediers, J. Vanderleyden and R. De Mot, *Microbiological Research*, 2009, 164, 461-468.
