# Supplementary material for: Genome-scale reconstruction of the metabolic network in Pseudomonas stutzeri A1501
Source: Royal Society of Chemistry journal article supplement (doi:10.1039/c5mb00086f), 2015-08-12
Supplement: c5mb00086f4.pdf [file c5mb00086f4.pdf]

## Genome-scale reconstruction of the metabolic network in *Pseudomonas stutzeri* A1501

Parizad Babaei, Sayed-Amir Marashi, Sedigheh Asad

### Supplementary file S4:

#### Results of Biolog assay for those carbon sources which are not present in *iPB890*.

These metabolites are presented as potential carbon sources in Biolog MicroPlates, but none of them are included in our metabolic network model of *P. stutzeri*. Therefore, if our model was perfect and complete, we would expect no growth phenotype (N). However, in 13 cases, we detect some growth (G) in Biolog assay. The reason behind this inconsistency can be further investigated in the future and might be useful for improving the metabolic network model.

|                              |   |                                 |   |
|------------------------------|---|---------------------------------|---|
| Adonitol                     | N | Itaconic Acid                   | G |
| alpha-Hydroxybutyric Acid    | N | Ketobutyric acid                | N |
| Beta-Hydroxybutyric Acid     | G | Ketovaleric acid                | N |
| Bromosuccinic acid           | G | Lactulose                       | N |
| Cyclodextrin                 | N | L-Alaninamide                   | G |
| D,L,alpha-Glycerol phosphate | N | L-Alanyl-Glycine                | G |
| D-Arabitol                   | N | L-Arabinose                     | N |
| Dextrin                      | N | L-Fructose                      | N |
| D-Galactonic acid lactone    | N | L-Pyroglyutamic acid            | G |
| D-Galactose                  | G | L-Rhamnose                      | N |
| D-Galacturonic acid          | G | Methyl-D-Glucoside              | N |
| D-Glucosaminic acid          | N | N-Acetyl-D-Galactosamine        | N |
| D-Glucuronic Acid            | N | Phenylethylamine                | N |
| D-Lactose                    | N | Propionic acid                  | N |
| D-Melibiose                  | N | Pyruvic Acid Methyl Ester       | G |
| D-Psicose                    | G | Quinic Acid                     | N |
| D-Raffinose                  | N | Sebacic Acid                    | N |
| D-Saccharic acid             | N | Succinamic Acid                 | N |
| D-Serine                     | N | Succinic Acid Mono-Methyl Ester | N |
| D-Sorbitol                   | N | Sucrose                         | N |
| Gamma-Hydroxybutyric Acid    | N | Turanose                        | N |
| Gentiobiose                  | G | Tween 40                        | G |
| Glucuronamide                | N | Tween 80                        | G |
| Glycyl-L-Aspartic Acid       | N | Urocanic acid                   | N |
| Glycyl-L-Glutamic Acid       | N | Xylitol                         | N |
| i-Erythritol                 | N |                                 |   |
